# Supplementary figures and images for: The role of higher-order thalamus during learning and correct performance in goal-directed behavior
Source: eLife journal article supplement (doi:10.7554/elife.77177), 2022-03-08

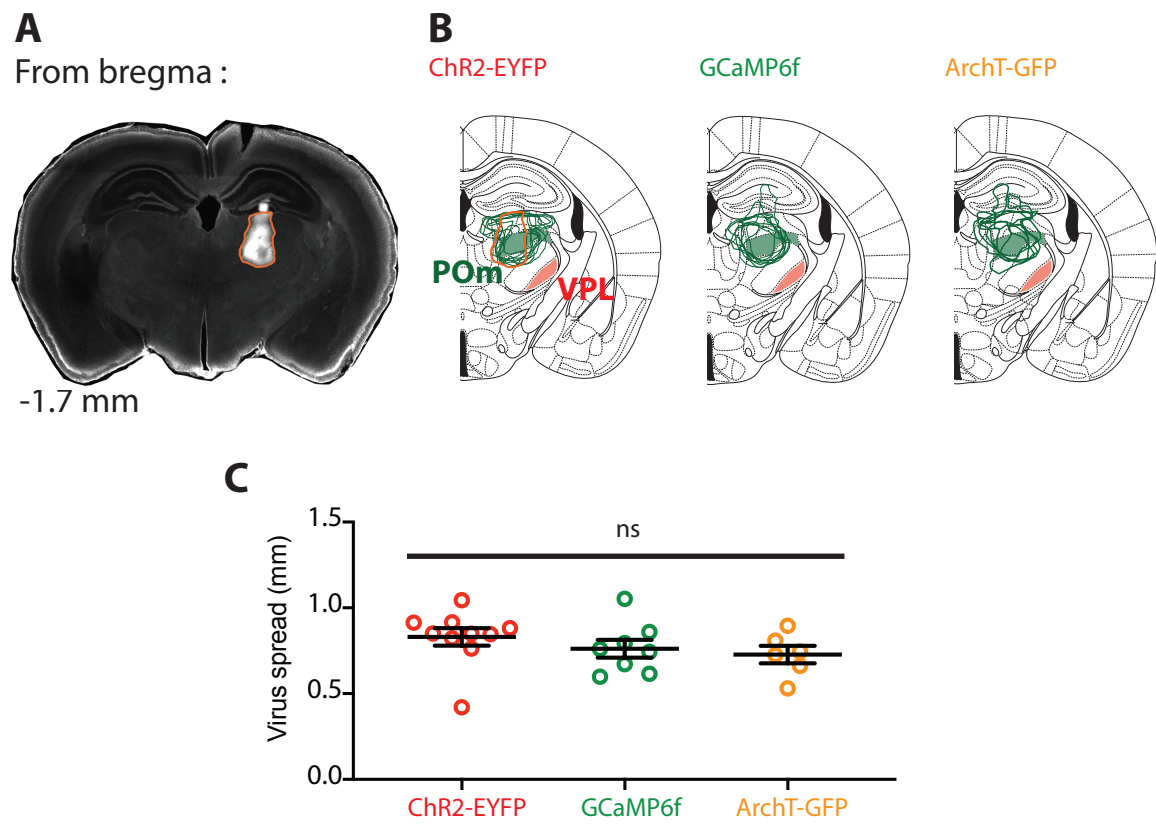

Figure 1 - Figure supplement 1

Supplement: supp [file elife_poa_e77177_Figure_1_figure_supplement_1.pdf › elife_poa_e77177_Figure_1_figure_supplement_1.pdf]

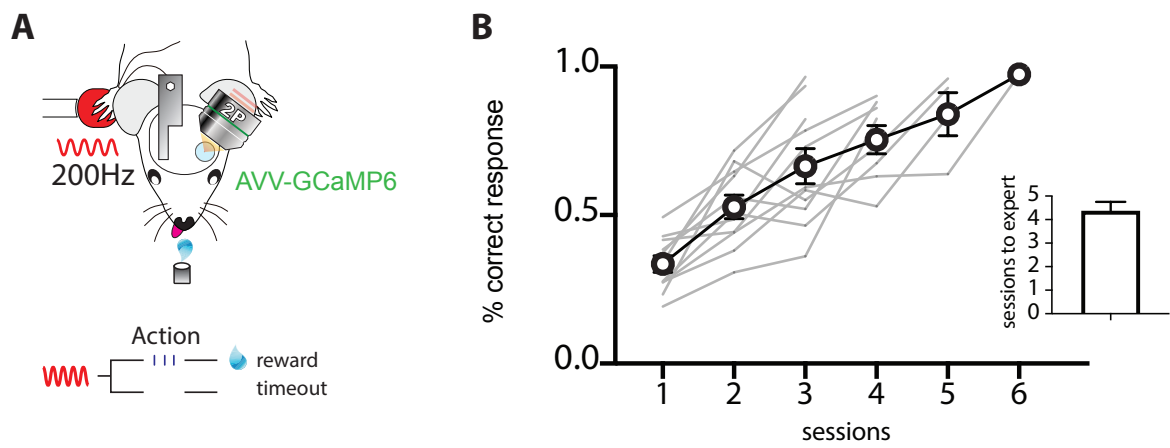

Figure 1 - Figure supplement 2

Supplement: supp [file elife_poa_e77177_Figure_1_figure_supplement_2.pdf › elife_poa_e77177_Figure_1_figure_supplement_2.pdf]

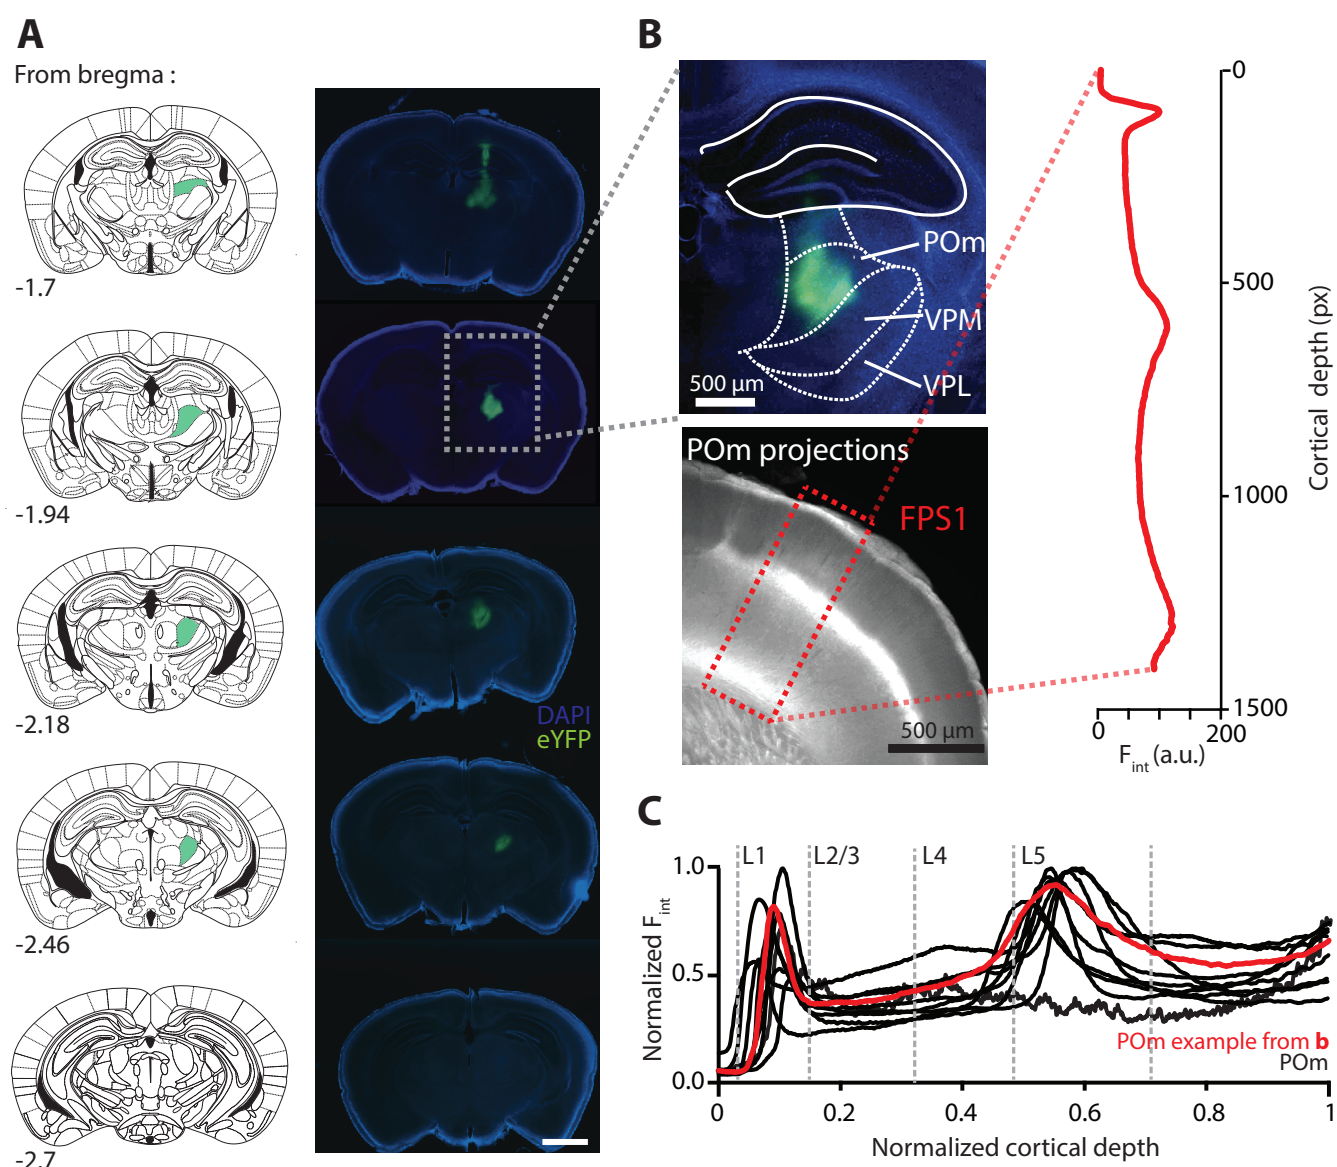

Figure 1 - Figure supplement 3

Supplement: supp [file elife_poa_e77177_Figure_1_figure_supplement_3.pdf › elife_poa_e77177_Figure_1_figure_supplement_3.pdf]

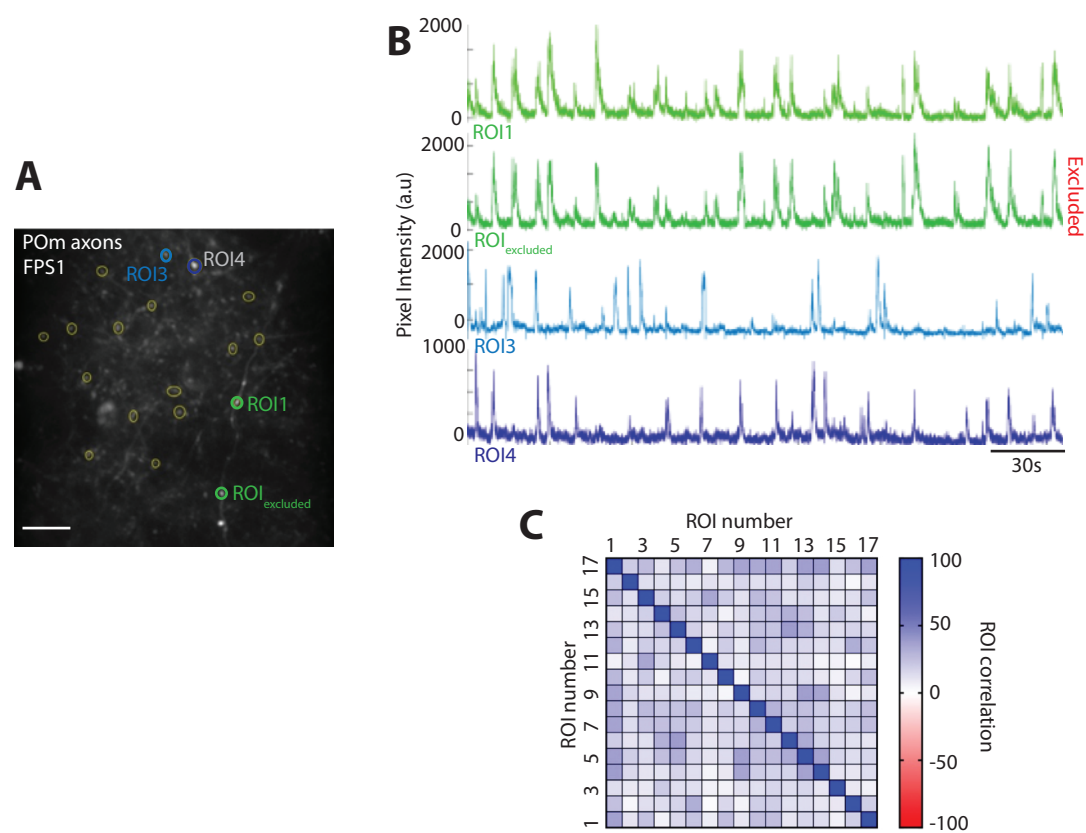

**Figure 1 - Figure supplement 4**

Supplement: supp [file elife_poa_e77177_Figure_1_figure_supplement_4.pdf › elife_poa_e77177_Figure_1_figure_supplement_4.pdf]

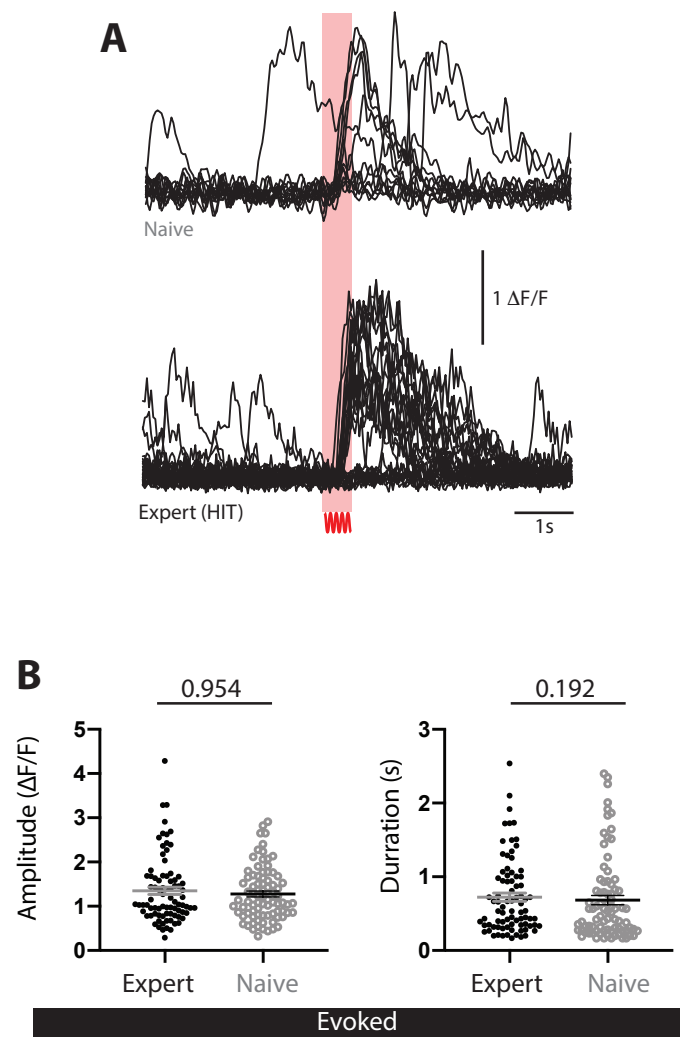

**Figure 1 - Figure supplement 5**

Supplement: supp [file elife_poa_e77177_Figure_1_figure_supplement_5.pdf › elife_poa_e77177_Figure_1_figure_supplement_5.pdf]

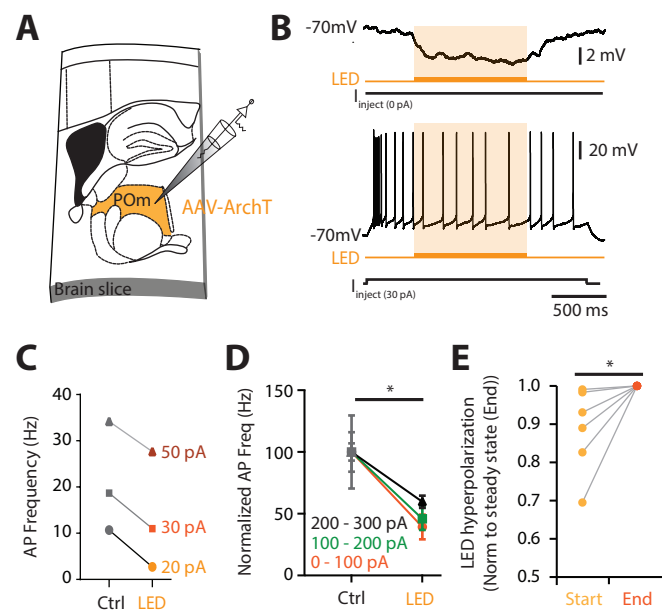

**Figure 5 - Figure supplement 1**

Supplement: supp [file elife_poa_e77177_Figure_5_figure_supplement_1.pdf › elife_poa_e77177_Figure_5_figure_supplement_1.pdf]

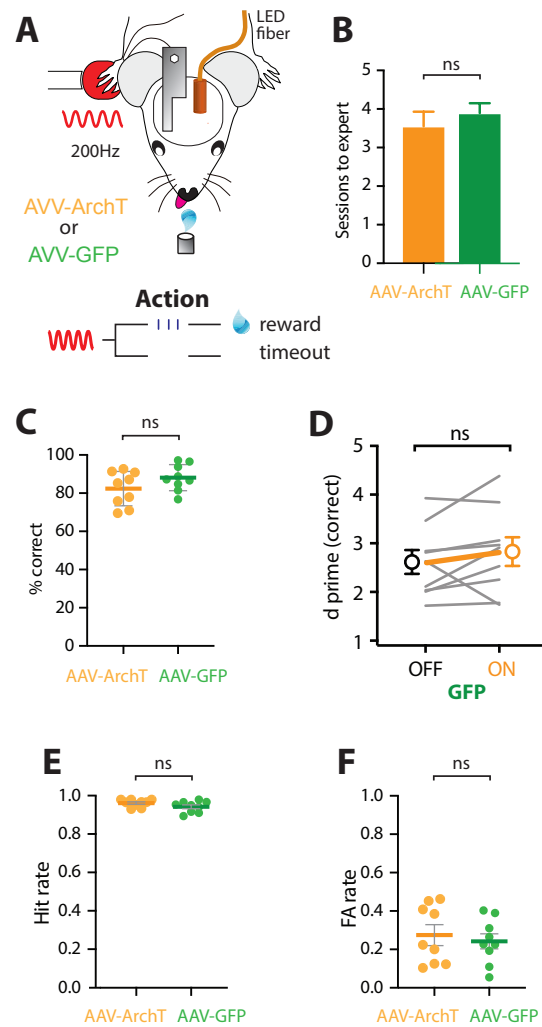

**Figure 5 - Figure supplement 2**

Supplement: supp [file elife_poa_e77177_Figure_5_figure_supplement_2.pdf › elife_poa_e77177_Figure_5_figure_supplement_2.pdf]
